# Supplementary material for: Shortened aerogel fabrication times using an ethanol–water azeotrope as a gelation and drying solvent
Source: Royal Society of Chemistry journal article supplement (doi:10.1039/c4ta04633a), 2014-11-05
Supplement: c4ta04633a1.pdf [file c4ta04633a1.pdf]

## Shortened Aerogel Fabrication Times using an Ethanol-Water Azeotrope as a Gelation and Drying Solvent.

L. S. White, M. F. Bertino, G. Kitchen, J. Young, C. Newton, R. Al-Soubaihi, S. Saeed and K. Saoud

### Supplemental information

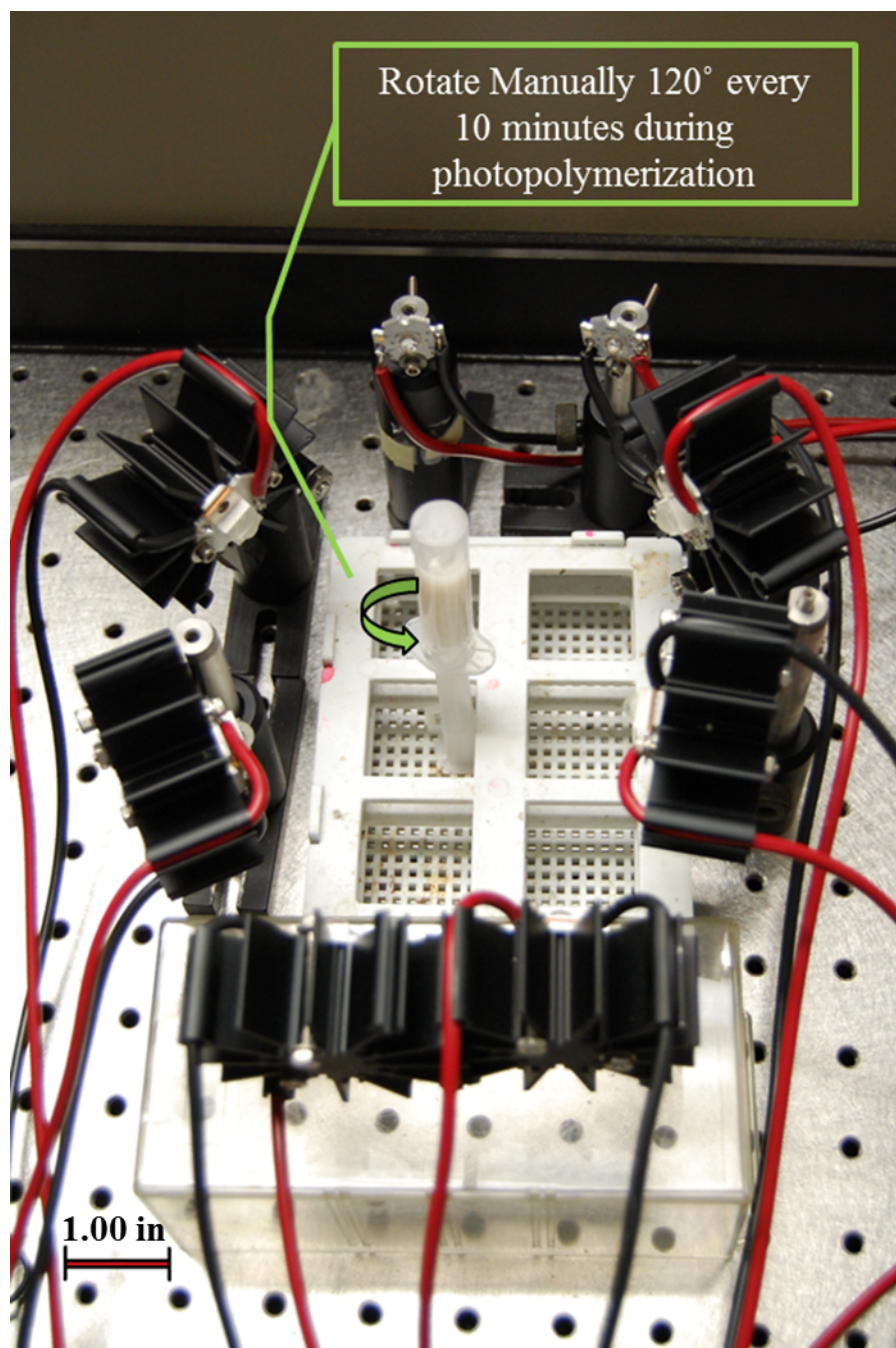

**Figure S1.** Digital camera image of the LED exposure array. The LEDs are mounted on heat sinks, and these, in turn, are attached to posts whose height can be varied to accommodate samples with different lengths. Up to 6 samples can be illuminated at the same time. Samples, however, must be rotated periodically within the array to ensure homogeneous illumination.

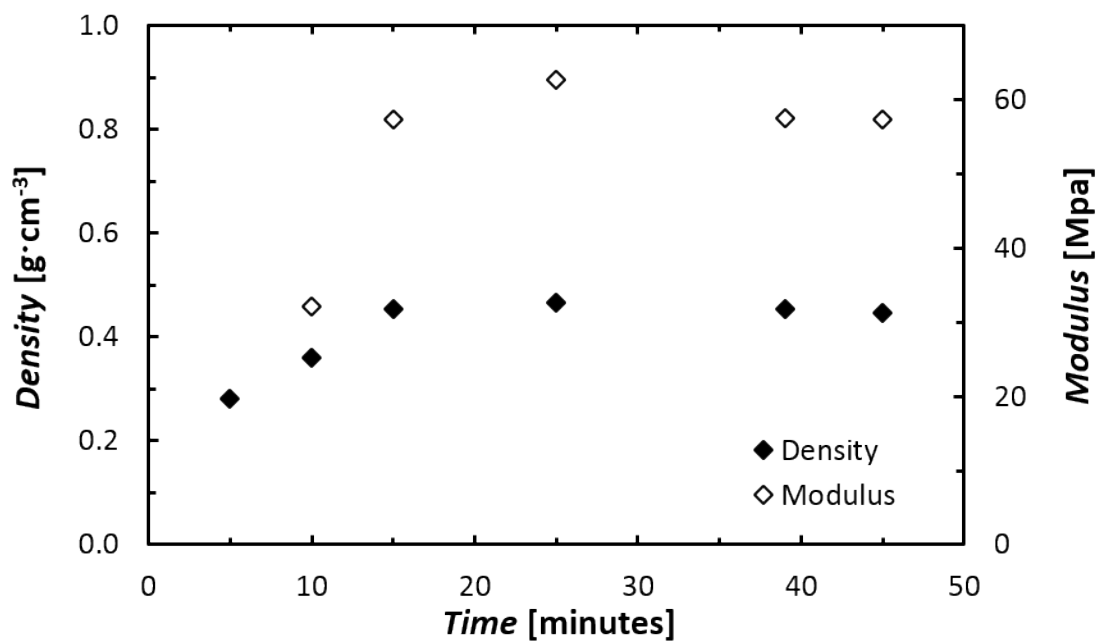

**Figure S2:** Dependence of density and Young's modulus of cross-linked aerogels on exposure time. The gelation solution had a TMOS concentration of 21.5% v/v, and the HDDA concentration was 27.4% v/v.

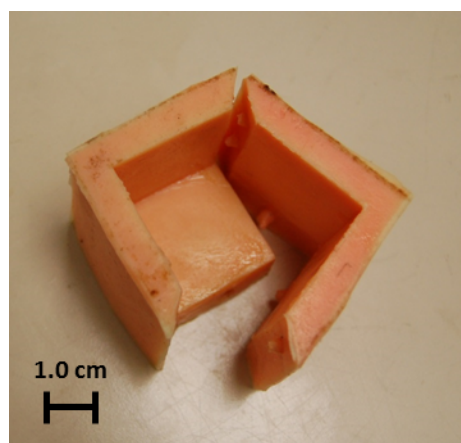

**Figure S3.** A two-part silicone mold used to produce the samples shown in Figure 9.
